# Supplementary material for: The Antimelanogenic Activity of the Extract of Heukharang Lettuce (Lactuca sativa L.) Leaf
Source: Hindawi journal article supplement (doi:10.1155/2024/6668222), 2024-02-02
Supplement: f1 [file 6668222.f1.pdf]

Figure S1

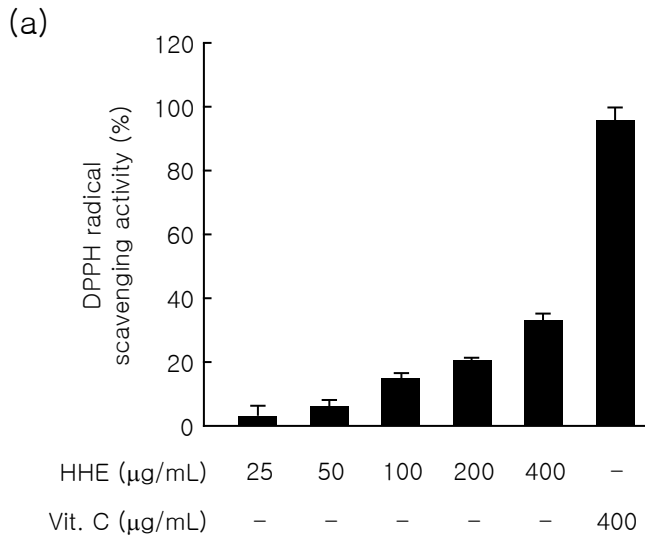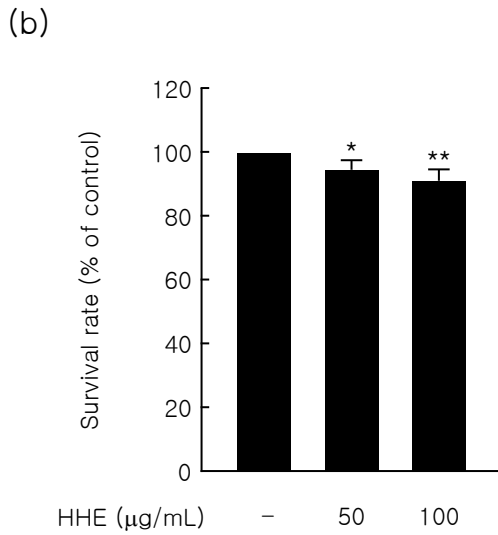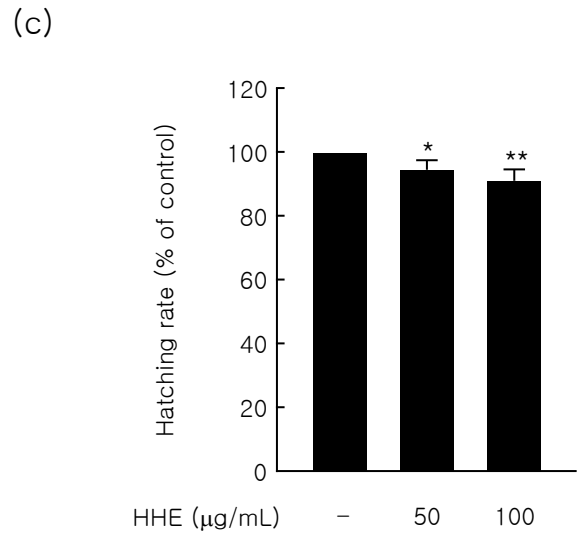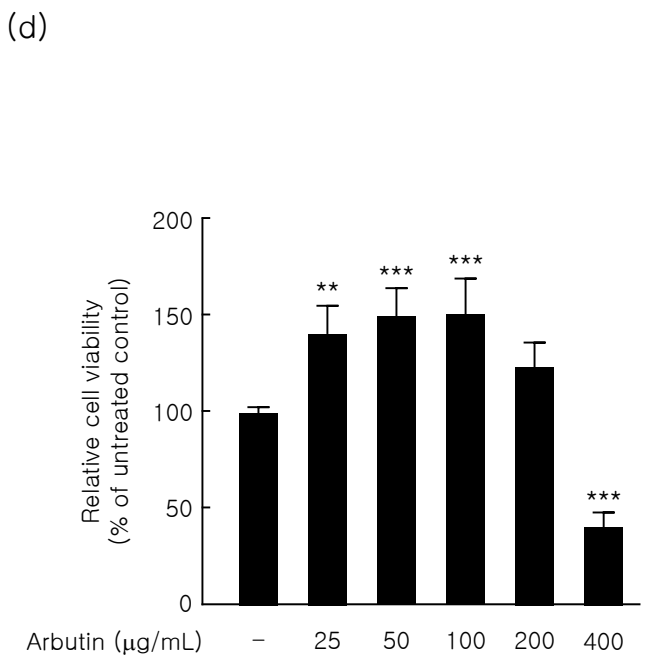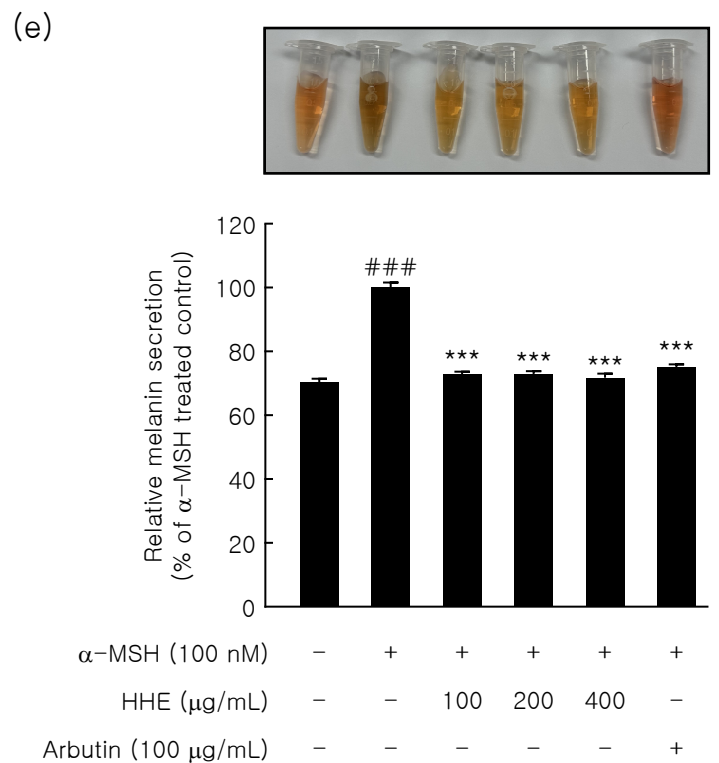

# Figure S2

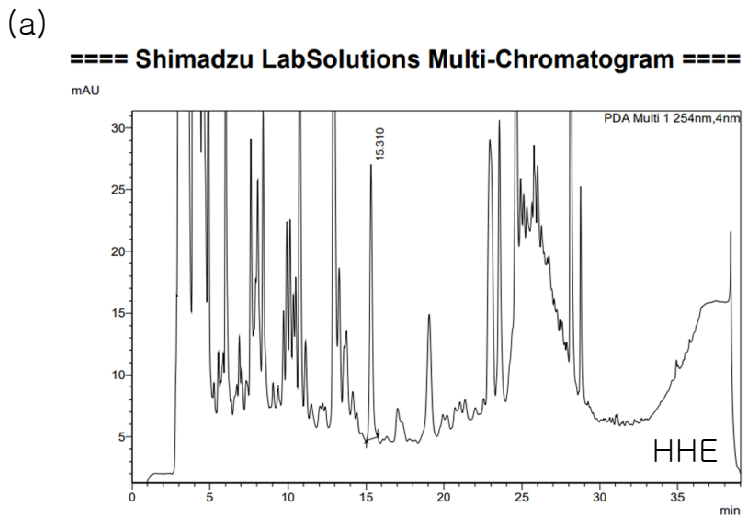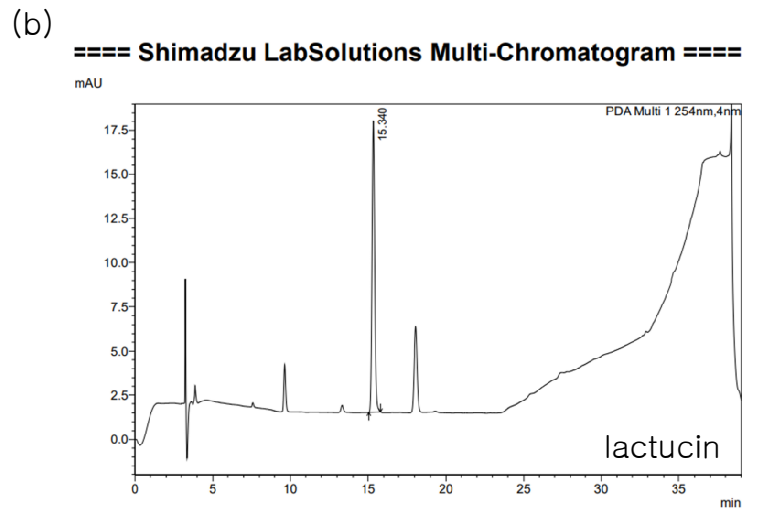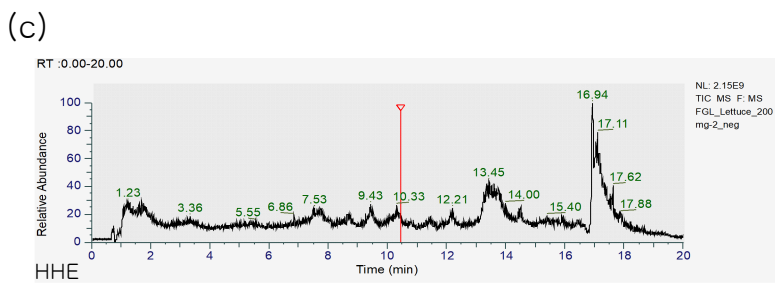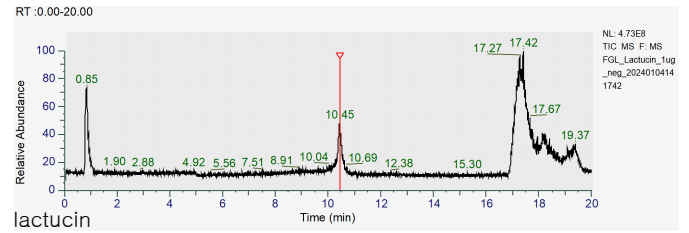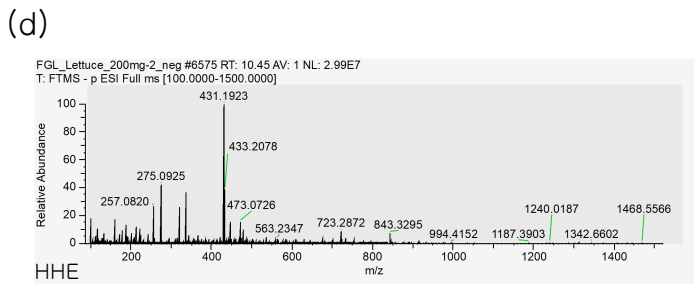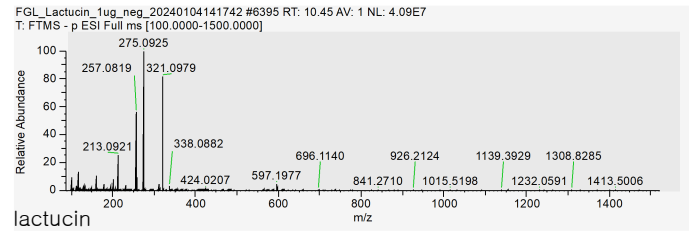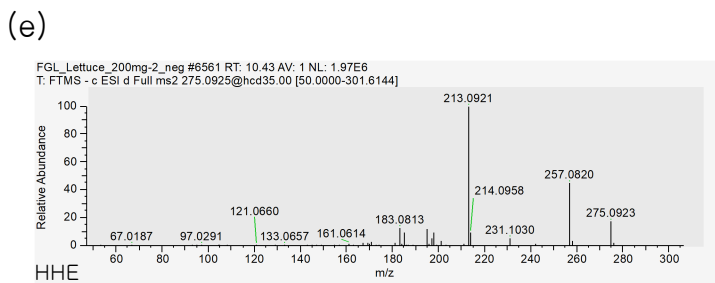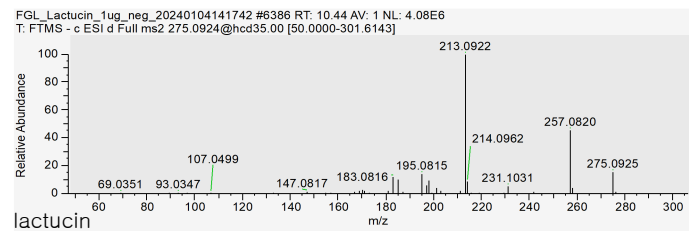

**Table S1.** Mobile phase conditions of HPLC

A: 0.1 % formic acid in water, B: 0.1% formic acid in acetonitrile

|           | Time (min) | % A | % B |
|-----------|------------|-----|-----|
| <i>1</i>  | 0          | 95  | 5   |
| <i>2</i>  | 5          | 8   | 12  |
| <i>3</i>  | 15         | 85  | 15  |
| <i>4</i>  | 20         | 80  | 20  |
| <i>5</i>  | 27         | 50  | 50  |
| <i>6</i>  | 30         | 40  | 60  |
| <i>7</i>  | 33         | 10  | 90  |
| <i>8</i>  | 35         | 10  | 90  |
| <i>9</i>  | 36         | 95  | 5   |
| <i>10</i> | 39         | 95  | 5   |
